# Supplementary material for: Ultra-Structural Imaging Provides 3D Organization of 46 Chromosomes of a Human Lymphocyte Prophase Nucleus
Source: MDPI journal article supplement (doi:10.3390/ijms22115987), 2021-06-01
Supplement: s1 [file s1]

**Supplementary Video S1: 3D visualization of a single prophase nucleus.** 46 chromosomes are seen as single entities with their chromatids displaying as parallel to one another and with no twists.
