# Supplementary material for: Ultra-Structural Imaging Provides 3D Organization of 46 Chromosomes of a Human Lymphocyte Prophase Nucleus
Source: MDPI journal article supplement (doi:10.3390/ijms22115987), 2021-06-01
Supplement: s1 [file s1]

## Supplementary Tables

| Material number              | Resolved<br>Chromosome number | Chromosome Volume<br>(nm <sup>3</sup> ) | p arm volume<br>(nm <sup>3</sup> ) | q arm volume<br>(nm <sup>3</sup> ) | p arm volume<br>% | q arm volume<br>% | Whole chromosome<br>volume % | Chromosome Length<br>(nm) | P arm length<br>(nm) | q arm length<br>(nm) | p arm length<br>% | q arm length<br>% | Whole chromosome<br>length % | Calculated DNA<br>content (Mbp) |
|------------------------------|-------------------------------|-----------------------------------------|------------------------------------|------------------------------------|-------------------|-------------------|------------------------------|---------------------------|----------------------|----------------------|-------------------|-------------------|------------------------------|---------------------------------|
| chromosome_1_-_4_final       | 1a                            | 803642675                               | 345890600                          | 457752075                          | 43.0              | 56.96             | 5.3                          | 4732.68                   | 2459.39              | 2571.02              | 47.17             | 52.83             | 3.94                         | 138.559                         |
| chromosome_1_-_42_final      | 1b                            | 784022525                               | 364984400                          | 419038125                          | 46.6              | 53.448            | 5.2                          | 5030.41                   | 2232.66              | 2500.02              | 48.9              | 51.1              | 4.19                         | 135.1762                        |
| chromosome_2_-_34_final      | 2a                            | 677657475                               | 200439525                          | 501378625                          | 41.8              | 58.203            | 4.7                          | 4769                      | 1817.95              | 2923.96              | 38.73             | 61.27             | 3.97                         | 116.8374                        |
| chromosome_2_-_22_fianl      | 2b                            | 701818150                               | 283245875                          | 394411600                          | 28.6              | 71.44             | 4.5                          | 4741.91                   | 1847.14              | 2921.86              | 38.33             | 61.67             | 3.95                         | 121.0031                        |
| chromosome_3_-_29_final      | 3a                            | 508193950                               | 251704200                          | 327906975                          | 44.5              | 55.531            | 3.8                          | 3439.11                   | 1776.67              | 2140.31              | 44.26             | 55.74             | 2.86                         | 87.6196                         |
| chromosome_3_-_17_final      | 3b                            | 579611175                               | 157372600                          | 401913600                          | 43.4              | 56.574            | 3.7                          | 3916.98                   | 1522.22              | 1916.89              | 45.35             | 54.65             | 3.26                         | 99.9329                         |
| chromosome4_-_20_final       | 4a                            | 499947800                               | 225991700                          | 282202250                          | 23.3              | 76.718            | 3.4                          | 3661.56                   | 1307.38              | 2445.61              | 28.25             | 71.75             | 3.05                         | 86.1978                         |
| chromosome_4_-_16_final      | 4b                            | 559286200                               | 116398975                          | 383548825                          | 28.1              | 71.862            | 3.3                          | 3752.99                   | 1034.58              | 2626.98              | 34.83             | 65.17             | 3.12                         | 96.4286                         |
| chromosome_5_30_final        | 5a                            | 455217125                               | 130147600                          | 357509625                          | 25.5              | 74.512            | 3.2                          | 3122.33                   | 978.26               | 2505.18              | 26.39             | 73.6              | 2.6                          | 78.4857                         |
| chromosome_5_-_18_final      | 5b                            | 487657225                               | 116029925                          | 339187200                          | 26.7              | 73.312            | 3.0                          | 3483.44                   | 824                  | 2298.33              | 28.08             | 71.91             | 2.9                          | 84.0788                         |
| chromosome_6_-_15_final      | 6a                            | 446786450                               | 172031750                          | 274754700                          | 38.5              | 61.496            | 3.0                          | 3469.08                   | 1482.34              | 1986.74              | 42.73             | 57.27             | 2.88                         | 77.0321                         |
| chromosome_6_-_23_final      | 6b                            | 415807425                               | 149413825                          | 273230100                          | 28.0              | 71.966            | 2.8                          | 2869.49                   | 1160.15              | 1709.34              | 40.43             | 59.57             | 2.39                         | 71.6909                         |
| chromosome_7_-_12_final      | 7a                            | 371382275                               | 116571400                          | 299236025                          | 40.2              | 59.808            | 2.8                          | 2980.63                   | 690.13               | 1476.13              | 36.17             | 63.83             | 2.48                         | 64.0314                         |
| chromosome_7_-_7_final       | 7b                            | 373772025                               | 137440875                          | 236331150                          | 36.8              | 63.229            | 2.5                          | 2779.43                   | 995.73               | 1783.7               | 35.82             | 64.18             | 2.31                         | 64.4434                         |
| chromosome_8_-_46_final      | 8a                            | 329942800                               | 149268625                          | 222113650                          | 19.4              | 80.648            | 2.5                          | 2369.78                   | 1078.28              | 1902.35              | 32.18             | 67.82             | 1.97                         | 56.8866                         |
| chromosome_8_-_10_final      | 8b                            | 368566000                               | 81523750                           | 287042250                          | 22.1              | 77.881            | 2.4                          | 2580.2                    | 840.25               | 1739.95              | 32.56             | 67.44             | 2.14                         | 63.5458                         |
| chromosome_9_-_8_final       | 9a                            | 269799750                               | 107572025                          | 238645275                          | 33.8              | 66.232            | 2.3                          | 2618.01                   | 743                  | 2360.99              | 32.73             | 67.27             | 2.18                         | 46.5171                         |
| chromosome_9_-_24_final      | 9b                            | 346217300                               | 87104875                           | 250252200                          | 31.1              | 68.93             | 2.2                          | 3103.99                   | 1498.37              | 2201.15              | 23.93             | 76.07             | 2.58                         | 59.6926                         |
| chromosome_10_-_1_final      | 10a                           | 324328400                               | 63851700                           | 266091100                          | 20.2              | 79.8              | 2.2                          | 1999.6                    | 762.74               | 1607.04              | 23.9              | 76.1              | 1.66                         | 55.918                          |
| chromosome_10_-_13_final     | 10b                           | 313586625                               | 88393525                           | 240548000                          | 35.6              | 64.396            | 2.2                          | 2341.92                   | 1181.39              | 1450.83              | 38.39             | 61.61             | 1.95                         | 54.0666                         |
| chromosome_11_-_25_final     | 11a                           | 328941525                               | 65500325                           | 258828075                          | 26.9              | 73.128            | 2.1                          | 2632.22                   | 477.95               | 1521.65              | 44.88             | 55.12             | 2.19                         | 56.714                          |
| chromosome_11_-_36_final     | 11b                           | 337357075                               | 117128000                          | 197302600                          | 25.8              | 74.181            | 2.1                          | 3699.52                   | 1871.05              | 1310.87              | 40.5              | 59.5              | 3.08                         | 58.165                          |
| chromosome_12_-_27_final.    | 12a                           | 255715350                               | 111649725                          | 201936900                          | 23.4              | 76.634            | 2.1                          | 2768.35                   | 899.07               | 1442.85              | 33.27             | 66.73             | 2.3                          | 44.0888                         |
| chromosome_12_-_14_          | 12b                           | 287741025                               | 55935275                           | 235704975                          | 26.1              | 73.906            | 1.9                          | 2627.77                   | 515.58               | 1196.24              | 26.25             | 73.75             | 2.188                        | 49.6105                         |
| chromosome_13_-_2_final      | 13a                           | 213495425                               | 75083525                           | 212657500                          | 11.8              | 88.151            | 1.9                          | 2016.5                    | 690.05               | 1937.72              | 13.34             | 86.66             | 1.67                         | 36.8095                         |
| chromosome_13_-_38_final     | 13b                           | 238463775                               | 91106950                           | 178692800                          | 9.6               | 90.415            | 1.8                          | 2037.57                   | 857.13               | 1760.88              | 16.49             | 83.51             | 1.697                        | 41.1144                         |
| chromosome_14_-_3_final      | 14a                           | 187441100                               | 102520275                          | 164950225                          | 16.8              | 83.218            | 1.8                          | 1910.41                   | 878.57               | 1443.88              | 24                | 76                | 1.59                         | 32.3174                         |
| chromosome_14_-_26_final     | 14b                           | 241776150                               | 59752825                           | 195962525                          | 14.1              | 85.874            | 1.7                          | 1807.73                   | 921.24               | 1847.11              | 11.63             | 88.37             | 1.5                          | 41.6855                         |
| chromosome_15_-_31_final     | 15a                           | 231563750                               | 34155275                           | 207620875                          | 16.6              | 83.367            | 1.6                          | 2120.93                   | 210.26               | 1597.47              | 26.07             | 73.93             | 1.76                         | 39.9247                         |
| chromosome_15_-_37_final     | 15b                           | 188212475                               | 22856900                           | 215606875                          | 19.7              | 80.309            | 1.6                          | 1810.24                   | 336.16               | 1701.41              | 27.9              | 72.1              | 1.5                          | 32.4504                         |
| chromosome_16_-_44_final..   | 16a                           | 267470500                               | 75119825                           | 161008650                          | 38.3              | 61.671            | 1.6                          | 2322.45                   | 740.94               | 1294.86              | 37.82             | 62.18             | 1.93                         | 46.1156                         |
| chromosome_16_-_41_final     | 16b                           | 422643925                               | 38517325                           | 193046425                          | 35.4              | 64.648            | 1.5                          | 2166.26                   | 553.08               | 1567.85              | 31.85             | 68.15             | 1.8                          | 72.8696                         |
| chromosome_17_-_21_final     | 17a                           | 181872075                               | 25298075                           | 188197350                          | 34.9              | 65.105            | 1.4                          | 1645.65                   | 269.09               | 1747.41              | 36.06             | 63.94             | 1.37                         | 31.3572                         |
| chromosome_17_-_39_final     | 17b                           | 236128475                               | 41896250                           | 170489000                          | 31.8              | 68.187            | 1.4                          | 2035.8                    | 599.28               | 1322.39              | 36.39             | 63.61             | 1.695                        | 40.711                          |
| chromosome_18_-_33_final     | 18a                           | 212385250                               | 85556075                           | 105139925                          | 19.7              | 80.274            | 1.3                          | 1921.67                   | 742.05               | 796.86               | 31.18             | 68.82             | 1.6                          | 36.6181                         |
| chromosome_18_-_45_final     | 18b                           | 291640250                               | 37062300                           | 151150175                          | 19.2              | 80.821            | 1.2                          | 1711.82                   | 505.2                | 1305.04              | 30.11             | 69.89             | 1.42                         | 50.2828                         |
| chromosome_19_-_28_final     | 19a                           | 112569325                               | 31456975                           | 155984125                          | 47.9              | 52.09             | 1.2                          | 1520.94                   | 458.58               | 1451.83              | 48.69             | 51.3              | 1.26                         | 19.4085                         |
| chromosome_19_-_6_final      | 19b                           | 126871525                               | 63464500                           | 118407575                          | 45.1              | 54.93             | 1.2                          | 1733.76                   | 593.43               | 1052.22              | 49.08             | 50.92             | 1.44                         | 21.8744                         |
| chromosome_20_-_43_final     | 20a                           | 114006200                               | 57184600                           | 69686925                           | 37.9              | 62.102            | 0.8                          | 1449.02                   | 882.91               | 850.85               | 46.8              | 53.2              | 1.2                          | 19.6562                         |
| chromosome_20_-_5_final      | 20b                           | 190696000                               | 21187100                           | 104468375                          | 44.9              | 55.135            | 0.8                          | 1538.91                   | 866.93               | 1891.44              | 48.21             | 51.79             | 1.28                         | 32.8786                         |
| chromosome_21_-_19_final     | 21a                           | 75440475                                | 43206075                           | 70800125                           | 18.0              | 81.985            | 0.8                          | 1475.33                   | 678.15               | 770.87               | 24.13             | 75.87             | 1.22                         | 13.0069                         |
| chromosome_21_-_11_final     | 21b                           | 86747925                                | 53932725                           | 58636600                           | 23.7              | 76.257            | 0.7                          | 1310.35                   | 740.67               | 780.27               | 36.11             | 63.89             | 1.09                         | 14.9565                         |
| chromosome_22_-_35_final     | 22a                           | 105871975                               | 31475125                           | 74396850                           | 29.7              | 70.271            | 0.7                          | 1057.13                   | 402.51               | 654.62               | 38.07             | 61.93             | 0.88                         | 18.2537                         |
| chromosome_22_-_9_final      | 22b                           | 92761625                                | 26145075                           | 66616550                           | 28.2              | 71.815            | 0.6                          | 1023.41                   | 294.14               | 729.27               | 28.74             | 71.26             | 0.85                         | 15.9933                         |
| chromosome_X_-_40_edited_new | (X) 23                        | 314430600                               | 20597225                           | 66150700                           | 37.3              | 62.75             | 0.6                          | 3181.92                   | 473.19               | 837.16               | 41.2              | 58.8              | 2.65                         | 54.2121                         |
| chromosome_Y_-_32_final      | (Y) 24                        | 125655475                               | 13591325                           | 61849150                           | 16.9              | 83.139            | 0.5                          | 2758.37                   | 356                  | 1119.33              | 31.43             | 68.57             | 2.3                          | 21.6647                         |
| Total                        |                               | 15085142600                             |                                    |                                    |                   |                   | 100.00                       | 120046.57                 |                      |                      |                   |                   | 99.83                        |                                 |

**Supplementary Table S1. Measurements of chromosomes after narrow segmentation.** Summary table showing raw data for volume and length measurements for all 46 narrow segmented prophase chromosomes obtained from Avizo software. Calculations for p and q arm %, whole chromosome % and DNA content are given in Supplementary calculations (S1, S2 and S4).

| Material number           | Resolved Chromosome number | Chromosome volume (nm <sup>3</sup> ) | Calculated DNA content (Mbp) | CenterX (nm) | CenterY (nm) | CenterZ (nm) | Radius/MEMB (nm) |
|---------------------------|----------------------------|--------------------------------------|------------------------------|--------------|--------------|--------------|------------------|
| chromosome 1 4 combined   | 1a                         | 1340912925                           | 231.19                       | 10618.946    | 20902.945    | 6659.7163    | 3326             |
| chromosome 1 42 combined  | 1b                         | 1599589750                           | 275.79                       | 11644.166    | 20413.619    | 3772.0825    | 3345             |
| chromosome 2 34 combined  | 2a                         | 1344812150                           | 231.86                       | 8554.6309    | 19515.209    | 5801.5547    | 2062             |
| chromosome 2 22 combined  | 2b                         | 1325101250                           | 228.46                       | 7463.1465    | 18429.328    | 5816.7554    | 2481             |
| chromosome 3 29 combined  | 3a                         | 1082759425                           | 186.68                       | 11467.317    | 16246.604    | 6685.4697    | 2808             |
| chromosome 3 17 combined  | 3b                         | 1181114275                           | 203.64                       | 9664.0703    | 20248.027    | 4075.1323    | 2527             |
| chromosome 4 20 combined  | 4a                         | 1248547575                           | 215.266                      | 7519.7549    | 18491.967    | 2953.1899    | 3281             |
| chromosome 4 16 combined  | 4b                         | 1221113850                           | 210.536                      | 7321.1499    | 19342.553    | 3555.5393    | 3301             |
| chromosome 5 30 combined  | 5a                         | 873943675                            | 150.67                       | 12443.127    | 16150.644    | 6099.0591    | 3317             |
| chromosome 5 18 combined  | 5b                         | 970550075                            | 167.33                       | 9795.4863    | 18826.332    | 2738.593     | 2620             |
| chromosome 6 15 combined  | 6a                         | 974942375                            | 168.09                       | 9164.1514    | 17051.939    | 2408.9419    | 3049             |
| chromosome 6 23 combined  | 6b                         | 932507675                            | 160.77                       | 8391.7148    | 17831.779    | 4130.8047    | 1820             |
| chromosome 7 12 combined  | 7a                         | 904453825                            | 155.94                       | 12082.962    | 18069.578    | 4741.6875    | 2300             |
| chromosome 7 7 combined   | 7b                         | 920943100                            | 158.78                       | 9958.002     | 18296.07     | 8247.1055    | 3037             |
| chromosome 8 46 combined  | 8a                         | 828205675                            | 142.794                      | 11395.227    | 19114.521    | 7020.4619    | 2623             |
| chromosome 8 10 combined  | 8b                         | 950742375                            | 163.92                       | 11293.394    | 20623.805    | 5300.4062    | 2998             |
| chromosome 9 8 combined   | 9a                         | 843742075                            | 145.47                       | 8832.0059    | 16114.48     | 7730.083     | 3294             |
| chromosome 9 24 combined  | 9b                         | 861644025                            | 148.55                       | 8710.6016    | 20613.592    | 5841.3682    | 2906             |
| chromosome 10 1 combined  | 10a                        | 606618375                            | 140.1                        | 10229.476    | 19518.533    | 8080.7876    | 3255             |
| chromosome 10 13 combined | 10b                        | 781436150                            | 134.73                       | 12664.235    | 19195.689    | 5547.1899    | 3086             |
| chromosome 11-25 combined | 11a                        | 774663175                            | 133.56                       | 10188.726    | 17243.354    | 7023.5005    | 1984             |
| chromosome 11 36 combined | 11b                        | 798149275                            | 137.61                       | 12262.213    | 18628.455    | 7966.0947    | 3713             |
| chromosome 12 27 combined | 12a                        | 692355950                            | 119.37                       | 8412.2676    | 18135.445    | 6597.7705    | 1981             |
| chromosome 12 14 combined | 12b                        | 774971725                            | 133.61                       | 11506.471    | 17753.301    | 7505.7173    | 2838             |
| chromosome 13 2 combined  | 13a                        | 633652800                            | 109.25                       | 10273.442    | 17865.865    | 5117.3169    | 473              |
| chromosome 13 38 combined | 13b                        | 605121000                            | 104.33                       | 9724.5742    | 18105.484    | 1737.3898    | 3492             |
| chromosome 14 3 combined  | 14a                        | 595259500                            | 102.63                       | 11124.825    | 17393.752    | 4060.9155    | 1843             |
| chromosome 14-26 combined | 14b                        | 629841300                            | 108.59                       | 10619.313    | 19079.908    | 5962.1445    | 1520             |
| chromosome 15 31 combined | 15a                        | 527647725                            | 90.97                        | 9963.1543    | 21162.957    | 5254.2305    | 3160             |
| chromosome 15 37 combined | 15b                        | 549954075                            | 94.819                       | 11028.442    | 18494.551    | 2870.9792    | 2685             |
| chromosome 16 44 combined | 16a                        | 664737700                            | 114.6                        | 12378.194    | 19470.723    | 4559.1138    | 3010             |
| chromosome 16-41 combined | 16b                        | 852520625                            | 146.98                       | 11729.229    | 19118.195    | 3371.3601    | 2875             |
| chromosome 17 21 combined | 17a                        | 552482975                            | 95.255                       | 9488.1924    | 19402.152    | 5563.043     | 1478             |
| chromosome 17-39 combined | 17b                        | 595465200                            | 102.66                       | 8904.0029    | 19655.193    | 3719.1455    | 2421             |
| chromosome 18 33 combined | 18a                        | 441713525                            | 76.15                        | 12222.978    | 20520.375    | 6738.0664    | 3783             |
| chromosome 18 45 combined | 18b                        | 519204950                            | 89.51                        | 10353.921    | 20735.186    | 4009.9011    | 3033             |
| chromosome 19 28 combined | 19a                        | 319603350                            | 55.1                         | 11001.119    | 15699.03     | 4639.0366    | 2650             |
| chromosome 19 6 combined  | 19b                        | 321245925                            | 55.38                        | 10594.163    | 19183.908    | 4354.3091    | 1651             |
| chromosome 20 43 combined | 20a                        | 270513650                            | 46.64                        | 10382.965    | 19169.367    | 2806.9492    | 2740             |
| chromosome 20 5 combined  | 20b                        | 391834300                            | 67.55                        | 9341.8633    | 20428.834    | 7704.5405    | 3501             |
| chromosome 21 19 combined | 21a                        | 247720275                            | 42.71                        | 8425.8857    | 18840.818    | 5090.5288    | 1644             |
| chromosome 21 11 combined | 21b                        | 260431325                            | 44.9                         | 11248.175    | 18673.49     | 4636.7568    | 1670             |
| chromosome 22 35 combined | 22a                        | 286379775                            | 49.37                        | 10381.077    | 18209.836    | 6159.3364    | 1100             |
| chromosome 22 9 combined  | 22b                        | 256807375                            | 44.277                       | 9317.1367    | 19341.57     | 4513.46      | 1601             |
| chromosome X combined     | (X) 23                     | 728537975                            | 125.6                        | 9267.6523    | 17432.012    | 6748.3257    | 1723             |
| chromosome Y combined     | (Y) 24                     | 304665900                            | 52.52                        | 10963.175    | 20246.205    | 7961.2949    | 3711             |
| Membrane_final            |                            | 2537239925                           |                              | 9835.2021    | 18005.523    | 5226.3589    | 891              |

**Supplementary Table S2: Medium segmentation of chromosomes.** Summary table showing raw data for volume and length measurements for all 46 wide segmented prophase chromosomes obtained from Avizo. Calculation for DNA content and distance from center of the nucleus are given in Supplementary calculations S1, S2, S4 and S6.

| Material number        | Resolved Chromosome number | Chromosome volume (nm <sup>3</sup> ) | Calculated DNA content (Mbp) |
|------------------------|----------------------------|--------------------------------------|------------------------------|
| chromosome_1_- 42_vws  | 1b                         | 2724369450                           | 469.7188707                  |
| chromosome_8_- 10_vws  | 8b                         | 1288175075                           | 222.0991509                  |
| chromosome_16_- 44_vws | 16a                        | 872688300                            | 150.4635                     |
| chromosome_18_- 45_vws | 18b                        | 825241175                            | 142.2829612                  |

**Supplementary Table S3: Wide segmentation of chromosomes.** Summary table showing raw data for volume and DNA content measurements for 4 wide segmented prophase chromosomes obtained from Avizo. Calculation for DNA content of chromosomes is given in Supplementary calculations S4.
